# Supplementary material for: TBM Hunter: Identify and Score Canonical, Extended, and Unconventional Tankyrase-Binding Motifs in Any Protein
Source: MDPI journal article supplement (doi:10.3390/ijms242316964), 2023-11-30
Supplement: s1 [file s1]

# Supporting Information

## TBM Hunter: identify and score canonical, extended, and unconventional tankyrase-binding motifs in any protein

Christopher M. Clements <sup>1</sup>, Samantha X. Shellman <sup>2</sup>, Melody H. Shellman <sup>3</sup> and Yiqun G. Shellman <sup>1,4,\*</sup>

Department of Dermatology, School of Medicine, University of Colorado Anschutz Medical Campus, Aurora, CO 80045, USA; christopher.m.clements@cuanschutz.edu

<sup>2</sup> Department of Computer Science, University of Colorado Boulder, Boulder, CO 80309, USA; samantha.shellman@colorado.edu

<sup>3</sup> H. Milton Stewart School of Industrial and Systems Engineering, Georgia Institute of Technology, Atlanta, GA 30332, USA; mshellman3@gatech.edu

<sup>4</sup> Charles C. Gates Regenerative Medicine and Stem Cell Biology Institute, School of Medicine, University of Colorado Anschutz Medical Campus, Aurora, CO 80045, USA

\* Correspondence: yiqun.shellman@cuanschutz.edu; Tel.: +1-(303)-724-4034

**Table S1: Full Canonical TBM Results Table.** Experimentally validated TBMs are bolded and underlined.

| Protein | Uniprot Code | Motif Seq              | Starting position  | Score              | References |
|---------|--------------|------------------------|--------------------|--------------------|------------|
| 3BP2    | P78314       | <b><u>RSPPDGQS</u></b> | <b><u>415</u></b>  | <b><u>0.80</u></b> | [1]        |
| MCL1    | Q07820       | RNAVIGLN               | 6                  | 0.45               |            |
|         |              | RREIGGGE               | 45                 | 0.35               |            |
|         |              | REIGGGEA               | 46                 | 0.65               |            |
|         |              | <b><u>RPPPIGAE</u></b> | <b><u>78</u></b>   | <b><u>0.69</u></b> | [1, 2]     |
|         |              | REQATGAK               | 187                | 0.48               |            |
|         |              | RRVGDGVQ               | 214                | 0.89               |            |
| NUMA1   | Q14980       | RAGRKGLE               | 761                | 0.34               |            |
|         |              | RLQQLGEA               | 770                | 0.34               |            |
|         |              | RAEELGQE               | 1321               | 0.37               |            |
|         |              | <b><u>RTQPDGTS</u></b> | <b><u>1743</u></b> | <b><u>0.79</u></b> | [1, 3]     |
|         |              | RRSQAGVS               | 1885               | 0.30               |            |
|         |              | RDRHEGRK               | 2017               | 0.46               |            |
| AXIN1   | O15169       | <b><u>RPPVPGEE</u></b> | <b><u>22</u></b>   | <b><u>0.38</u></b> | [1, 4]     |
|         |              | RRYSEGRE               | 284                | 0.49               |            |
|         |              | REFRYGSW               | 290                | 0.32               |            |
|         |              | RMEEEGED               | 417                | 0.54               |            |
|         |              | RCVDMGCA               | 450                | 0.32               |            |
|         |              | RSPDSGHV               | 492                | 0.32               |            |
|         |              | RHRRTGHG               | 645                | 0.30               |            |
|         |              | RRTGHGSS               | 647                | 0.61               |            |
|         |              | RKVGGGSA               | 770                | 0.61               |            |

|       |        |                 |             |             |        |
|-------|--------|-----------------|-------------|-------------|--------|
|       |        | RTLVRGRA        | 797         | 0.31        |        |
|       |        | RAVTLGQF        | 803         | 0.31        |        |
| TERF1 | P54274 | <u>RGCADGRD</u> | <u>13</u>   | <u>0.78</u> | [1, 3] |
|       |        | RAFRDGRS        | 88          | 0.45        |        |
|       |        | RKYGEGNW        | 396         | 0.76        |        |
| FAT4  | Q6V017 | RGNEAGRF        | 178         | 0.29        |        |
|       |        | RLQDEGTP        | 288         | 0.48        |        |
|       |        | RLFTIGRH        | 1679        | 0.30        |        |
|       |        | RAEDGGGQ        | 1917        | 0.31        |        |
|       |        | RDDDRGSN        | 2285        | 0.33        |        |
|       |        | RVFFAGFS        | 3698        | 0.16        |        |
|       |        | RVTVGGIR        | 4106        | 0.29        |        |
|       |        | RQSLRGAM        | 4230        | 0.32        |        |
|       |        | RCVPPGDC        | 4423        | 0.49        |        |
|       |        | <u>RKQPEGNP</u> | <u>4572</u> | <u>0.64</u> | [1]    |
|       |        | RHSPLGFA        | 4653        | 0.49        |        |
|       |        | <u>RNPADGIP</u> | <u>4827</u> | <u>0.76</u> | [1]    |
| DISC1 | Q9NRI5 | RARQCGLD        | 82          | 0.48        |        |
|       |        | RVRAAGSL        | 170         | 0.46        |        |
|       |        | <u>RGEAEGCP</u> | <u>223</u>  | <u>0.65</u> | [1]    |
|       |        | REGLEGLL        | 618         | 0.47        |        |
| BABA1 | Q9NWW8 | <u>RSNPEGAE</u> | <u>28</u>   | <u>0.70</u> | [1]    |
|       |        | <u>RSEGEGEA</u> | <u>48</u>   | <u>0.82</u> | [1]    |
| LKB1  | Q15831 | <u>RAKLIGKY</u> | <u>42</u>   | <u>0.44</u> | [5]    |
|       |        | <u>RRIPNGEA</u> | <u>86</u>   | <u>0.50</u> | [5]    |
| AMPK  | P54619 | N/A             | N/A         | N/A         | [5]    |

**Table S2: Normalized score matrix for canonical and unconventional TBMs**

|            | Amino acid position within the peptide |          |          |          |          |          |          |          |
|------------|----------------------------------------|----------|----------|----------|----------|----------|----------|----------|
| Amino acid | 1                                      | 2        | 3        | 4        | 5        | 6        | 7        | 8        |
| P          | -0.12953                               | 0.014145 | 0.026554 | 0.047979 | -0.12953 | -0.12953 | -0.12953 | 0.012124 |
| G          | -0.12953                               | 0.013083 | 0.006632 | 0.175959 | -0.12953 | 0.259067 | 0.008238 | 0.008238 |
| A          | -0.12953                               | 0.011036 | 0.029326 | 0.023212 | -0.12953 | -0.12953 | 0.018679 | 0.017461 |
| V          | -0.12953                               | 0.007694 | 0.009456 | -0.12953 | 0.017876 | -0.12953 | 0.007902 | 0.009689 |
| L          | -0.12953                               | 0.018601 | 0.00671  | -0.12953 | -0.12953 | -0.12953 | 0.00557  | 0.006606 |
| I          | -0.12953                               | 0.007953 | 0.005104 | -0.12953 | 0.009845 | -0.12953 | 0.010363 | 0.007539 |
| M          | -0.12953                               | 0.015699 | 0.011813 | -0.12953 | -0.12953 | -0.12953 | 0.013523 | 0.008731 |
| C          | -0.12953                               | 0.009948 | 0.010207 | 0.011917 | 0.009352 | -0.12953 | 0.028031 | 0.012461 |
| S          | -0.12953                               | 0.016451 | 0.017824 | -0.12953 | -0.12953 | -0.12953 | 0.015466 | 0.012461 |

|          |          |          |          |          |          |          |          |          |
|----------|----------|----------|----------|----------|----------|----------|----------|----------|
| <b>T</b> | -0.12953 | 0.019119 | 0.009974 | -0.12953 | -0.12953 | -0.12953 | 0.014223 | 0.007798 |
| <b>R</b> | 0.259067 | 0.005751 | 0.014508 | -0.12953 | -0.12953 | -0.12953 | 0.007798 | 0.002642 |
| <b>K</b> | -0.12953 | 0.005052 | 0.011166 | -0.12953 | -0.12953 | -0.12953 | 0.007979 | 0.002332 |
| <b>H</b> | -0.12953 | 0.008731 | 0.006865 | -0.12953 | -0.12953 | -0.12953 | 0.012539 | 0.008083 |
| <b>D</b> | -0.12953 | 0.019119 | 0.028705 | -0.12953 | 0.161813 | -0.12953 | 0.02114  | 0.048497 |
| <b>E</b> | -0.12953 | 0.029456 | 0.027073 | -0.12953 | 0.032358 | -0.12953 | 0.030518 | 0.05456  |
| <b>N</b> | -0.12953 | 0.006606 | 0.007772 | -0.12953 | -0.12953 | -0.12953 | 0.013731 | 0.011788 |
| <b>Q</b> | -0.12953 | 0.012409 | 0.01513  | -0.12953 | 0.015337 | -0.12953 | 0.019767 | 0.00671  |
| <b>W</b> | -0.12953 | 0.011788 | 0.008679 | -0.12953 | -0.12953 | -0.12953 | 0.007642 | 0.004741 |
| <b>F</b> | -0.12953 | 0.011399 | -0.12953 | -0.12953 | -0.12953 | -0.12953 | 0.008834 | 0.007047 |
| <b>Y</b> | -0.12953 | 0.015052 | 0.005596 | -0.12953 | 0.012487 | -0.12953 | 0.007098 | 0.009482 |

**Table S3: Normalized score matrix for extended TBMs**

|                   | Amino acid position within the peptide |            |            |          |            |            |
|-------------------|----------------------------------------|------------|------------|----------|------------|------------|
| <b>Amino acid</b> | <b>R1</b>                              | <b>G-2</b> | <b>G-1</b> | <b>G</b> | <b>G+1</b> | <b>G+2</b> |
| <b>P</b>          | -0.13774                               | 0.051019   | -0.13774   | -0.13774 | -0.13774   | 0.012893   |
| <b>G</b>          | -0.13774                               | 0.187107   | -0.13774   | 0.275482 | 0.00876    | 0.00876    |
| <b>A</b>          | -0.13774                               | 0.024683   | -0.13774   | -0.13774 | 0.019862   | 0.018567   |
| <b>V</b>          | -0.13774                               | -0.13774   | 0.019008   | -0.13774 | 0.008402   | 0.010303   |
| <b>L</b>          | -0.13774                               | -0.13774   | -0.13774   | -0.13774 | 0.005923   | 0.007025   |
| <b>I</b>          | -0.13774                               | -0.13774   | 0.010468   | -0.13774 | 0.011019   | 0.008017   |
| <b>M</b>          | -0.13774                               | -0.13774   | -0.13774   | -0.13774 | 0.01438    | 0.009284   |
| <b>C</b>          | -0.13774                               | 0.012672   | 0.009945   | -0.13774 | 0.029807   | 0.013251   |
| <b>S</b>          | -0.13774                               | -0.13774   | -0.13774   | -0.13774 | 0.016446   | 0.013251   |
| <b>T</b>          | -0.13774                               | -0.13774   | -0.13774   | -0.13774 | 0.015124   | 0.008292   |
| <b>R</b>          | 0.275482                               | -0.13774   | -0.13774   | -0.13774 | 0.008292   | 0.00281    |
| <b>K</b>          | -0.13774                               | -0.13774   | -0.13774   | -0.13774 | 0.008485   | 0.002479   |
| <b>H</b>          | -0.13774                               | -0.13774   | -0.13774   | -0.13774 | 0.013333   | 0.008595   |
| <b>D</b>          | -0.13774                               | -0.13774   | 0.172066   | -0.13774 | 0.022479   | 0.05157    |
| <b>E</b>          | -0.13774                               | -0.13774   | 0.034408   | -0.13774 | 0.032452   | 0.058017   |
| <b>N</b>          | -0.13774                               | -0.13774   | -0.13774   | -0.13774 | 0.014601   | 0.012534   |
| <b>Q</b>          | -0.13774                               | -0.13774   | 0.016309   | -0.13774 | 0.021019   | 0.007135   |
| <b>W</b>          | -0.13774                               | -0.13774   | -0.13774   | -0.13774 | 0.008127   | 0.005041   |
| <b>F</b>          | -0.13774                               | -0.13774   | -0.13774   | -0.13774 | 0.009394   | 0.007493   |
| <b>Y</b>          | -0.13774                               | -0.13774   | 0.013278   | -0.13774 | 0.007548   | 0.010083   |

### References for supporting information

1. Guettler, S., et al., *Structural basis and sequence rules for substrate recognition by tankyrase explain the basis for cherubism disease*. Cell, 2011. **147**(6): p. 1340-1354.
2. Bae, J., J.R. Donigian, and A.J.W. Hsueh, *Tankyrase 1 interacts with Mcl-1 proteins and inhibits their regulation of apoptosis*. Journal of Biological Chemistry, 2003. **278**(7): p. 5195-5204.
3. Sbodio, J.I. and N.-W. Chi, *Identification of a Tankyrase-binding Motif Shared by IRAP, TAB182, and Human TRF1 but Not Mouse TRF1 NuMA CONTAINS THIS RXXPDG MOTIF AND IS A NOVEL TANKYRASE PARTNER\**. Journal of Biological Chemistry, 2002. **277**: p. 31887-31892.
4. Huang, S.M.A., et al., *Tankyrase inhibition stabilizes axin and antagonizes Wnt signalling*. Nature, 2009. **461**(7264): p. 614-620.
5. Li, N., et al., *Tankyrase disrupts metabolic homeostasis and promotes tumorigenesis by inhibiting LKB1-AMPK signalling*. Nature Communications, 2019. **10**(1).
